# Supplementary material
Source: publisher figshare collection journal article supplement (https://tandf.figshare.com/ndownloader/files/20035625)
Supplement: Supplementary file 1 [file 20035625]

Supplementary table 1 - Prevalence of smart drug use at any point in life and in the previous 12 months and response rate over graduation course

| College Course* | Nº respondents | Response rate (%) | At any point in life use (%) | Previous 12 months use (%) |
| --- | --- | --- | --- | --- |
| Agriculture Science Bac | 71 | 75 | 9,9 | 8,5 |
| Antropology Bac | 24 | 67 | 4,2 | 4,2 |
| Application of Geoespatial Science Tec | 15 | 39 | 6,7 | 6,7 |
| Architecture Bac | 26 | 79 | 0 | 0 |
| Biology Bac | 23 | 70 | 4,8 | 0 |
| Biology Tp | 26 | 67 | 11,5 | 7,7 |
| Biotecnology Bac | 33 | 97 | 15,2 | 6,1 |
| Business Bac | 33 | 85 | 6,1 | 3 |
| Chemistry – Food Science Bac | 14 | 61 | 7,1 | 7,1 |
| Cinematography - Animation Bac | 26 | 93 | 3,9 | 3,9 |
| Cinematography Bac | 24 | 83 | 0 | 0 |
| Civil Engineering Bac | 33 | 79 | 15,2 | 12,1 |
| Computer Sciences Bac | 28 | 64 | 0 | 0 |
| Dance - Fine Arts Tp | 12 | 80 | 8,3 | 8,3 |
| Dental Hygine Bac | 31 | 72 | 7,1 | 6,5 |
| Design Bac | 24 | 100 | 0 | 0 |
| Economics Bac | 36 | 72 | 14,3 | 11,1 |
| Eletronic Engineering Technology Bac | 23 | 61 | 0 | 0 |
| Engineering – Agricultural Technology Bac | 20 | 57 | 10,5 | 5 |
| Engineering – Automatation Technology Bac | 19 | 59 | 0 | 0 |
| Engineering - Science in Forest Resources Bac | 16 | 55 | 0 | 0 |
| Environmental Design and Planning Bac | 24 | 73 | 4,2 | 4,2 |
| Environmental Engineering - Bac | 13 | 46 | 23,1 | 7,7 |
| General Management and Eadership Tec | 36 | 75 | 2,9 | 0 |
| Geological Engineering Bac | 10 | 33 | 30 | 10 |
| Hotel and Restaurant Management Tec | 18 | 100 | 16,7 | 5,6 |
| Husbandry Bac | 26 | 74 | 4 | 3,9 |
| International Relation Bac | 33 | 72 | 18,2 | 12,1 |
| Journalism Bac | 40 | 85 | 2,6 | 0 |
| Languages – Portuguese and English Tp | 40 | 77 | 12 | 3,9 |
| Languages – Portuguese and French Tp | 26 | 70 | 0 | 0 |
| Languages – Portuguese and German Tp | 23 | 100 | 7,1 | 0 |
| Languages – Portuguese and Spanish Tp | 14 | 54 | 13 | 8,3 |
| Languages – Portuguese Tp | 14 | 82 | 2,6 | 0 |
| Languages – Text Editing Bac | 13 | 52 | 7,7 | 0 |
| Languages – Translation Studies Portuguese/English Bac | 4 | 67 | 0 | 0 |
| Law School | 88 | 60 | 17,6 | 14,3 |
| Major in Chemistry Bac | 12 | 57 | 0 | 0 |
| Major in Chemistry Tp | 18 | 62 | 5,6 | 0 |
| Major in Geography Tp | 42 | 64 | 2,4 | 2,4 |
| Major in History Bac | 32 | 67 | 6,3 | 3,1 |
| Major in History Tp | 31 | 65 | 3,5 | 0 |
| Major in Mathematics (Evening Course) Tp | 14 | 42 | 0 | 0 |
| Major in Mathematics Tp | 18 | 58 | 5,6 | 5,6 |
| Major in Theatre Tp | 20 | 91 | 10 | 10 |
| Manufacturing Engineering Bac | 27 | 66 | 0 | 0 |
| Materials Engineering Bac | 19 | 68 | 0 | 0 |
| Medicine Bac | 40 | 75 | 15,4 | 10 |
| Meteorology Bac | 11 | 85 | 18,2 | 9,1 |
| Museum Studies Bac | 15 | 68 | 0 | 0 |
| Music - Sciences in Music Bac | 9 | 56 | 0 | 0 |
| Music – Brazilian Popular Music Bac | 7 | 58 | 0 | 0 |
| Music - Composition Bac | 2 | 50 | 12,5 | 0 |
| Music - Guitar Bac | 2 | 33 | 0 | 0 |
| Music - Piano Bac | 3 | 43 | 0 | 0 |
| Music – Singing Course Bac | 1 | 25 | 15,5 | 0 |
| Music – Transverse Flute Bac | 23 | 79 | 0 | 0 |
| Music - Violin Bac | 2 | 100 | 0 | 0 |
| Music Tp | 8 | 100 | 4,4 | 4,4 |
| Nursing Bac | 42 | 79 | 14,3 | 4,8 |
| Nutrition Bac | 30 | 70 | 16,7 | 10 |
| Petroleum Engineering Bac | 18 | 75 | 5,6 | 5,6 |
| Philosophya | - | - | 7,7 | 0 |
| Philosophy Bac | 7 | 44 | 0 | 0 |
| Philosophy Tp | 22 | 43 | 7,7 | 0 |
| Physical Education and Sport Bac | 43 | 61 | 4,8 | 4,7 |
| Physical Education and Sport Tp | 40 | 73 | 2,5 | 2,5 |
| Physics Bac | 7 | 50 | 0 | 0 |
| Physics Tp | 14 | 54 | 7,1 | 7,1 |
| Preservation and Restoration of Movable Property Bac | 16 | 70 | 6,3 | 0 |
| Public Admnistration Tec | 33 | 67 | 9,4 | 6,1 |
| Social Sciences Bac | 24 | 55 | 4,4 | 4,2 |
| Social Sciences Tp | 19 | 58 | 5,9 | 5,3 |
| Software Engineering Bac | 23 | 58 | 4,4 | 0 |
| Teacher Education Tp | 32 | 67 | 0 | 0 |
| Tourism Management Bac | 25 | 66 | 4 | 0 |
| Veterinary Medicine Bac | 44 | 75 | 11,6 | 4,6 |
| Visual Arts Bac | 23 | 62 | 8,7 | 4,4 |
| Visual Arts Tp | 35 | 64 | 5,9 | 0 |
| Water Engineering Bac | 32 | 82 | 3,2 | 3,1 |

Legend: tp – teaching program; bac – bachelor degree.* It is possible that some graduation courses are available only in Brazilian Universities. a it was not possible to differentiate between teaching program and bachelor degree course.
